# Supplementary material for: Extending Miscanthus Cultivation with Novel Germplasm at Six Contrasting Sites
Source: PubMed Central journal article supplement (PMC5395641; doi:10.3389/fpls.2017.00563), 2017-04-19
Supplement: Table1.pdf [file Table1.pdf]

**Supplementary Table 1.** Information on the source species (parents for hybrids) and climate in which germplasm was collected for the 15 genotypes of miscanthus used in the multi-location trial.

| Genotype ID | Accession type* | Parents if known | Species     | Resultant species | Chromosome Nr. | Supplier | Germplasm type | Lat     | Alt  | Summer rain (mm) | Mean Max monthly temperature | Mean Min monthly temperature | Annual Degree days above 10°C |
|-------------|-----------------|------------------|-------------|-------------------|----------------|----------|----------------|---------|------|------------------|------------------------------|------------------------------|-------------------------------|
| OPM-1       | wild            |                  | Sac         |                   | 76             | IBERS    | clone          | 32      | 3    | 829              | 28.3                         | 2.9                          | 1734                          |
| OPM-2       | wild            |                  | Sac         |                   | 76             | IBERS    | clone          | 31      | 139  | 1695             | 27.6                         | 8.5                          | 1801                          |
| OPM-3       | wild            |                  | Sac         |                   | 76             | IBERS    | clone          | 34      | 22   | 1465             | 24.8                         | 3.3                          | 1798                          |
| OPM-4       | wild            |                  | Sac         |                   | 38             | IBERS    | clone          | 37      | -1   | 550              | 26.3                         | -2.3                         | 480                           |
|             | breeders line   | Mother           | Sin         |                   |                |          |                | 23      | 1718 | 1509             | 21.4                         | 11.9                         | 1803                          |
|             | breeders line   | Father           | Sac         |                   |                |          |                | 33      | 600  | 2020             | 25.1                         | 3.2                          | 1800                          |
| OPM-5       | hybrid          | Hybrid           |             | Sin × Sac         | 38             | IBERS    | clone          |         |      |                  |                              |                              |                               |
|             | breeders line   | Mother           | Sac         |                   |                |          |                | Unknown |      |                  |                              |                              |                               |
|             | breeders line   | Father           | Sin         |                   |                |          |                | 36      |      | 1343             | 19.1                         | -6.3                         | 826                           |
| OPM-6       | hybrid          |                  |             | Sac × Sin         | 38             | IBERS    | clone          |         |      |                  |                              |                              |                               |
|             | breeders line   | Mother           | Sac         |                   |                |          |                | 45      | 112  | 496              | 20.9                         | -15.9                        | 393.8                         |
|             | breeders line   | Father           | Sin         |                   |                |          |                | Unknown |      |                  |                              |                              |                               |
| OPM-7       | hybrid          |                  |             | Sac × Sin         | 38             | IBERS    | clone          |         |      |                  |                              |                              |                               |
|             | breeders line   | Mother           | Sac         |                   |                |          |                | Unknown |      |                  |                              |                              |                               |
|             | breeders line   | Father           | Sin         |                   |                |          |                | Unknown |      |                  |                              |                              |                               |
| OPM-8       | hybrid          |                  |             | Sac × Sin         | 38             | IBERS    | clone          |         |      |                  |                              |                              |                               |
| OPM-9       | horticultural   |                  | M. × gig    |                   | 57             | IBERS    | clone          | Unknown |      |                  |                              |                              |                               |
| OPM-10      | hybrid          |                  | Sac × Sin   |                   | 38             | IBERS    | clone          | Unknown |      |                  |                              |                              |                               |
| OPM-11      | horticultural   |                  | Sin Goliath |                   | 57             | IBERS    | clone          | Unknown |      |                  |                              |                              |                               |
|             | breeders line   | Mother           | Sin         |                   |                |          |                | 37      |      | 928              | 23.9                         | -0.8                         | 1578                          |
|             | unknown         | Father           | Unknown     |                   |                |          |                | Unknown |      |                  |                              |                              |                               |
| OPM-12      | hybrid          |                  |             | Sin-H             | 38             | IBERS    | seed           |         |      |                  |                              |                              |                               |

| Genotype ID | Accession type*           | Parents if known | Species | Resultant species     | Chromosome Nr. | Supplier | Germplasm type | Lat     | Alt | Summer rain (mm) | Mean Max monthly temperature | Mean Min monthly temperature | Annual Degree days above 10°C |
|-------------|---------------------------|------------------|---------|-----------------------|----------------|----------|----------------|---------|-----|------------------|------------------------------|------------------------------|-------------------------------|
| OPM-13      | BIOMIS population Cycle 2 |                  | Sin     |                       | 38             | WU       | seed           | Unknown |     |                  |                              |                              |                               |
| OPM-14      | HS-family                 |                  | Sin     |                       | 38             | WU       | seed           | Unknown |     |                  |                              |                              |                               |
| OPM-15      | open-pollinated hybrid    |                  |         | (Sac × Sin) × Unknown | 38             | IBERS    | seed           |         |     |                  |                              |                              |                               |
|             | breeders line             | Mother           | Sac     |                       |                |          |                | Unknown |     |                  |                              |                              |                               |
|             | breeders line             | Father           | Sin     |                       |                |          |                | Unknown |     |                  |                              |                              |                               |
