# Supplementary material for: Extending Miscanthus Cultivation with Novel Germplasm at Six Contrasting Sites
Source: PubMed Central journal article supplement (PMC5395641; doi:10.3389/fpls.2017.00563), 2017-04-19
Supplement: Table2.pdf [file Table2.pdf]

**Supplementary Table 2.** Latitude, longitude, altitude, soil types, previous land use and planting dates at the six locations of the field trials.

| <b>Site</b> | <b>Latitude</b> | <b>Longitude</b> | <b>Altitude, m</b> | <b>Soil type<br/>(FAO )</b>                             | <b>Previous land use</b> | <b>Planting date</b> |
|-------------|-----------------|------------------|--------------------|---------------------------------------------------------|--------------------------|----------------------|
| Adana       | 37              | 35               | 27                 | Typic Xerofluvent                                       | arable                   | 14.04.2012           |
| Stuttgart   | 48.74           | 8.93             | 463                | Vertic Eutrudept                                        | arable                   | 22.05.2012           |
| Potash      | 48.89           | 30.44            | 237                | Luvic Chernozem                                         | arable                   | 18.05.2012           |
| Wageningen  | 51.59           | 5.39             | 10                 | Eutric Fluvisols                                        | horticultural            | 21.05.2012           |
| Aberystwyth | 52.43           | -4.01            | 39                 | Dystric gleysol                                         | grassland                | 18.05.2012           |
| Moscow      | 55              | 37               | 140                | Stagnic Cutanik Albeluvisol<br>(Siltic, Eutric, Ruptic) | arable                   | 21.05.2012           |
