# Supplementary material for: Extending Miscanthus Cultivation with Novel Germplasm at Six Contrasting Sites
Source: PubMed Central journal article supplement (PMC5395641; doi:10.3389/fpls.2017.00563), 2017-04-19
Supplement: Table3.pdf [file Table3.pdf]

**Supplementary Table 3.** Soil characteristics at the locations of the field trials.

| <b>Location</b> | <b>Soil depth, cm</b> | <b>pH</b> | <b>Total K<br/>kg hectare<sup>-1</sup></b> | <b>Total P<br/>kg hectare<sup>-1</sup></b> | <b>Total Mg<br/>kg hectare<sup>-1</sup></b> | <b>Nmin<br/>kg hectare<sup>-1</sup></b> | <b>Bulk density<br/>kg m<sup>-3</sup></b> | <b>Stone<br/>fraction</b> |
|-----------------|-----------------------|-----------|--------------------------------------------|--------------------------------------------|---------------------------------------------|-----------------------------------------|-------------------------------------------|---------------------------|
| Adana           | >200                  | 7.7       | 669                                        | 66                                         | 911                                         | 181                                     | 1.52                                      | 10%                       |
| Stuttgart       | 40-100                | 7.74      | 609                                        | 296                                        | 1,371                                       | 87                                      | 1.46                                      | 9%                        |
| Potash          | >200                  | 6.5       | 363                                        | 240                                        | 1,470                                       | 113                                     | 1.43                                      | 0%                        |
| Wageningen      | 40-100                | 5.88      | 359                                        | 403                                        | 331                                         | 45                                      | 1.43                                      | 0%                        |
| Aberystwyth     | 30-50                 | 5.56      | 126                                        | 46                                         | 171                                         | 31                                      | 1.41                                      | 35%                       |
| Moscow          | >200                  | 4.9       | 148                                        | 127                                        | 772                                         | 254                                     | 1.56                                      | 3%                        |
