# Supplementary material for: Extending Miscanthus Cultivation with Novel Germplasm at Six Contrasting Sites
Source: PubMed Central journal article supplement (PMC5395641; doi:10.3389/fpls.2017.00563), 2017-04-19
Supplement: Table4.pdf [file Table4.pdf]

**Supplementary Table 4.** Mean air temperature and rainfall at the field sites in six countries for the period April to September in 2012-2015, the long term air temperature mean for this period (over 10 years data during last 30 years), and the annual means.

| Location    | Air temperature |       |       |       |      | Rainfall (total) |      |           |           |           |
|-------------|-----------------|-------|-------|-------|------|------------------|------|-----------|-----------|-----------|
|             | Long-term       | 2012  | 2013  | 2014  | 2015 | Long-term        | 2012 | 2013      | 2014      | 2015      |
| Adana       | 26.1            | 25.01 | 25.30 | 25.22 | 25.3 | 75.4             | 133  | 156(233*) | 246(134*) | 104(161*) |
| Stuttgart   | 16.4            | 14.90 | 14.36 | 14.75 | 15.4 | 378.8            | 394  | 622       | 524       | 315       |
| Potash      | 18.5            | 18.50 | 16.92 | 16.96 | 17.6 | 300.2            | 281  | 329       | 401       | 215       |
| Wageningen  | 15.8            | 14.39 | 14.27 | 15.19 | 14.4 | 376.2            | 448  | 320       | 501       | 431       |
| Aberystwyth | 13.8            | 11.95 | 12.60 | 13.40 | 12.3 | 401.2            | 727  | 414       | 231       | 529       |
| Moscow      | 14.8            | 15.51 | -     | 15.50 | 14.7 | 347.0            | 389  | 609       | 237       | 462       |

(\*) – Amount of irrigation applied additionally in Adana, Turkey.
