# Supplementary material for: Extending Miscanthus Cultivation with Novel Germplasm at Six Contrasting Sites
Source: PubMed Central journal article supplement (PMC5395641; doi:10.3389/fpls.2017.00563), 2017-04-19
Supplement: Table5.pdf [file Table5.pdf]

**Supplementary Table 5.** The degree-days (DD) and photosynthetically active radiation (PAR) at the six locations from the date of planting until 1<sup>st</sup> November 2012.

| <b>Location</b> | <b>PAR (GJ/m<sup>2</sup>)</b> | <b>DD<sub>(base0)</sub></b> | <b>DD<sub>(base10)</sub></b> |
|-----------------|-------------------------------|-----------------------------|------------------------------|
| Adana           | 1770                          | 5501                        | 2790                         |
| Stuttgart       | 1020                          | 3179                        | 1118                         |
| Potash          | 1664                          | 3840                        | 1712                         |
| Wageningen      | 1175                          | 2863                        | 979                          |
| Aberystwyth     | 958                           | 2888                        | 593                          |
| Moscow          | 1140                          | 3060                        | 1200                         |
