# Supplementary material for: Extending Miscanthus Cultivation with Novel Germplasm at Six Contrasting Sites
Source: PubMed Central journal article supplement (PMC5395641; doi:10.3389/fpls.2017.00563), 2017-04-19
Supplement: Table6.pdf [file Table6.pdf]

**Supplementary Table 6.** Air and minimum soil temperatures recorded at the soil surface and at 5–20 cm depth in the field during the first winter (from November 2012 until March 2013) for the 15 miscanthus genotypes at six field locations.

| Location    | Temperature, °C       |             |                          |                         |                          |                          |                          |
|-------------|-----------------------|-------------|--------------------------|-------------------------|--------------------------|--------------------------|--------------------------|
|             | Min air <sub>2m</sub> | Average air | Min soil <sub>surf</sub> | Min soil <sub>5cm</sub> | Min soil <sub>10cm</sub> | Min soil <sub>20cm</sub> | Min soil <sub>50cm</sub> |
| Adana       | −1.4                  | 11.8        | −4.6                     | 6.1                     | 7.9                      | NA                       | NA                       |
| Stuttgart   | −14.1                 | 0.3         | −9.5                     | −4.4                    | NA                       | NA                       | NA                       |
| Potash      | −20.3                 | −3.1        | −19.3                    | NA                      | 0.0                      | 1.7                      | 0.6                      |
| Wageningen  | −13.0                 | 3.1         | −6.4                     | −0.4                    | NA                       | NA                       | 3.4                      |
| Aberystwyth | −5.0                  | 5.3         | 0.6                      | 1.0                     | 1.6                      | NA                       | NA                       |
| Moscow      | −23.5                 | −4.8        | −29.0                    | NA                      | NA                       | 0.7                      | NA                       |

NA – data not available for this location.
